# Supplementary material for: Differentiation of Human Cardiac Atrial Appendage Stem Cells into Adult Cardiomyocytes: A Role for the Wnt Pathway?
Source: PubMed Central journal article supplement (PMC7312541; doi:10.3390/ijms21113931), 2020-05-30
Supplement: ijms-21-03931-s001.pdf [file ijms-21-03931-s001.pdf]

SUPPLEMENTARY MATERIAL

RAA

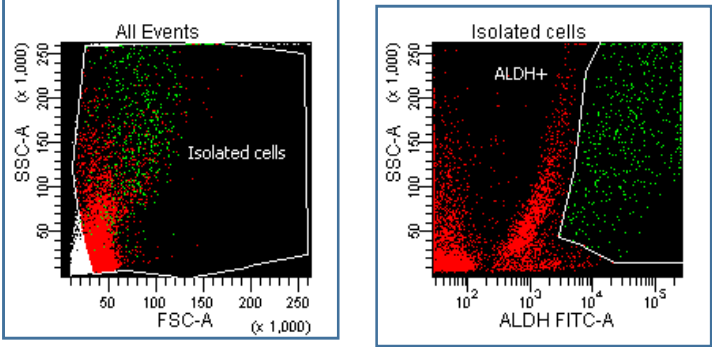

LAA

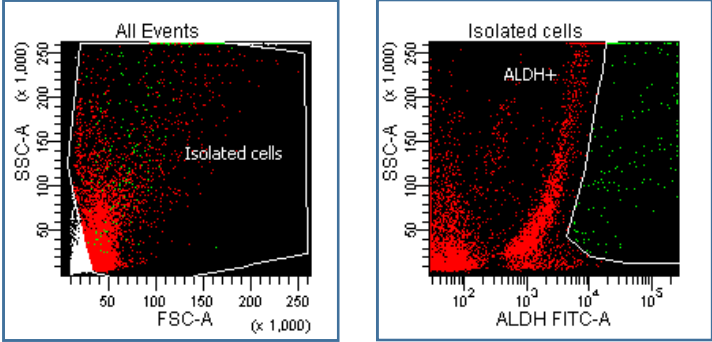

**Figure 1. Percentages of ALDH<sup>br</sup> cells in the human atrial appendage.** Representative FACS plots showing the percentage of ALDH<sup>br</sup> cells in right (top) and left atrial appendage (bottom). LAA = left atrial appendage; RAA = right atrial appendage.

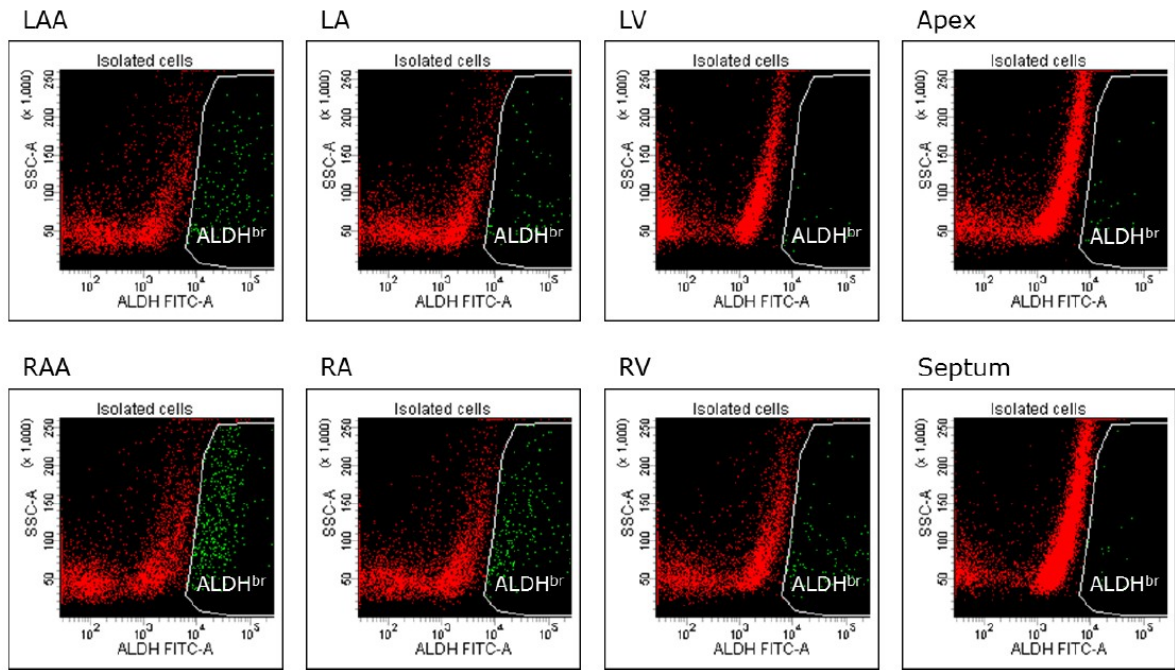

**Figure 2. Percentages of ALDH<sup>br</sup> cells in different compartments of the pig heart.** Representative FACS plots showing the percentage of ALDH<sup>br</sup> cells in different compartments of the pig heart. LA = left atrium; LAA = left atrial appendage; LV = left ventricle; RA = right atrium; RAA = right atrial appendage; RV = right ventricle.
